## CXXC4 activates apoptosis through up-regulating GDF15 in gastric cancer

Mengjiao Han<sup>1</sup>, Dongjun Dai<sup>1</sup>, Neelum Aziz Yousafzai<sup>1</sup>, Faliang Wang<sup>2</sup>, Hanying Wang<sup>1</sup>, Qiying Zhou<sup>1</sup>, Haiqi Lu<sup>1</sup>, Wenxia Xu<sup>2</sup>, Lifeng Feng<sup>2</sup>, Hongchuan Jin<sup>2</sup> and Xian Wang<sup>1</sup>

<sup>1</sup>Department of Medical Oncology, Sir Run Run Shaw Hospital, Medical School of Zhejiang University, Hangzhou, China

<sup>2</sup>Laboratory of Cancer Biology, Key Laboratory of Biotherapy in Zhejiang, Sir Run Run Shaw Hospital, Medical School of Zhejiang University, Hangzhou, China

**Correspondence to:** Xian Wang, **email:** wangx118@zju.edu.cn

**Keywords:** CXXC4, GDF15, apoptosis, gastric cancer

**Received:** June 30, 2017

**Accepted:** September 05, 2017

**Published:** October 06, 2017

**Copyright:** Han et al. This is an open-access article distributed under the terms of the Creative Commons Attribution License 3.0 (CC BY 3.0), which permits unrestricted use, distribution, and reproduction in any medium, provided the original author and source are credited.

### ABSTRACT

**Worldwide, gastric cancer is one of the most fatal cancers. Epigenetic alterations in gastric cancer play important roles in silencing of tumor suppressor genes. We previously found that CXXC finger protein 4 (CXXC4) was a novel tumor suppressor in gastric cancer. In this report, we demonstrated that CXXC4 inhibited growth of gastric cancer cells as a pro-apoptotic factor. This inhibition could be reversed by the pan-caspase inhibitor called Z-VAD-FMK. However, CXXC4 with mutations in its DNA binding domain failed to induce apoptosis. Growth differentiation factor 15 (GDF15) was identified as one of potential targets responsible for CXXC4-induced apoptosis. CXXC4 activated GDF15 transcription through enhancing the interaction of transcription factor Sp1 with GDF15 promoter. In summary, the nuclear protein CXXC4 activated apoptosis in gastric cancer through up-regulating its novel potential downstream target GDF15. GDF15 might be a promising target for clinical treatment of gastric cancer with CXXC4 deficiency.**

### INTRODUCTION

Despite recent advances in diagnosis and treatment, gastric cancer remains the fourth most common cancer worldwide [1] and the second leading cause of cancer deaths [2–4]. Genetic and epigenetic alterations play significant roles in gastric carcinogenesis [5]. As a result, aberrant activation of oncogenes and inactivation of tumor suppressor genes eventually altered signaling pathways critical for cell proliferation, differentiation, cell cycle and cell fate decision in gastric cancer [5–8].

We recently found that tumor suppressor CXXC finger protein 4 (CXXC4) was downregulated in gastric cancer and its downregulation was associated with a poor prognosis in gastric cancer patients [9]. It was

directly regulated by EZH2 and functioned to negatively regulate Wnt/ $\beta$ -catenin and Ras/MAPK signaling [9–12]. However, CXXC4 was named after its CXXC domain which was well-known for the DNA-binding capability, indicating that CXXC4 might play a role in the regulation of genome integrity or function [13–15]. Indeed, we found in this report that CXXC4 located in the nucleus and was able to stimulate the transcription of GDF15 (growth differentiation factor 15) to activate apoptosis.

GDF15 is a divergent member of the transforming growth factor-beta (TGF- $\beta$ ) superfamily that exerts complex effects on several cellular pathophysiology conditions including stress responses, bone formation, ischemia, and cancers [16, 17]. Previous evidence demonstrated that GDF15 had both anti-tumorigenic

and pro-tumorigenic activities. For example, GDF15 expression could be activated by tumor suppressor genes p53, EGR-1, and GSK-3 $\beta$  to exhibit pro-apoptotic activities in colorectal, lung and other cancers [18–21]. Moreover, GDF15 could induce apoptosis by upregulating death receptor-4 (DR4) and DR-5 expression in gastric cancer cells [22]. In contrast, the aberrant increase of secreted GDF15 in serum correlated with poor prognosis in several cancers such as prostate cancer, breast cancer and gastric cancer [23]. Therefore, the role of GDF15 may vary from different cancer types [16]. However, the exact mechanism of GDF15 regulation in gastric carcinogenesis remains rarely understood.

## RESULTS

### CXXC4 inhibited cell growth by activating apoptosis

We have found previously that CXXC4 served as a tumor suppressor gene in human gastric cancer [24]. To further investigate the functions of CXXC4 in gastric cancer, a stable doxycycline (Dox)-dependent CXXC4 expressing SGC7901 (SGC7901-WT) cell line

was established. As expected, the growth of SGC7901-WT cells was remarkably inhibited upon Dox-induced expression of CXXC4 (Figure 1A). Meanwhile, cell apoptosis was significantly increased (Figure 1B and 1C). Z-VAD-FMK, a pan-caspase inhibitor, potently reversed CXXC4-promoted cell apoptosis and growth inhibition (Figure 1D and 1E). Taken together, these results indicated that CXXC4 suppressed cell growth through activating apoptosis.

### CXXC4 localized in the nucleus and activated apoptosis through its DNA binding domain

CXXC domain has been demonstrated in several proteins characteristic of specific DNA binding activity, indicating that CXXC4 might exert its functions in the nucleus [12]. We therefore investigated the cellular location of CXXC4 and whether it could bind to DNA like other CXXC-containing proteins. Firstly, nuclear/cytoplasmic fractionation of SGC7901-WT cells demonstrated that CXXC4 was mainly located in the nucleus (Figure 2A). Moreover, an immunofluorescence assay was also conducted to further validate the nuclear location of CXXC4 (Figure 2B). Subsequently, a

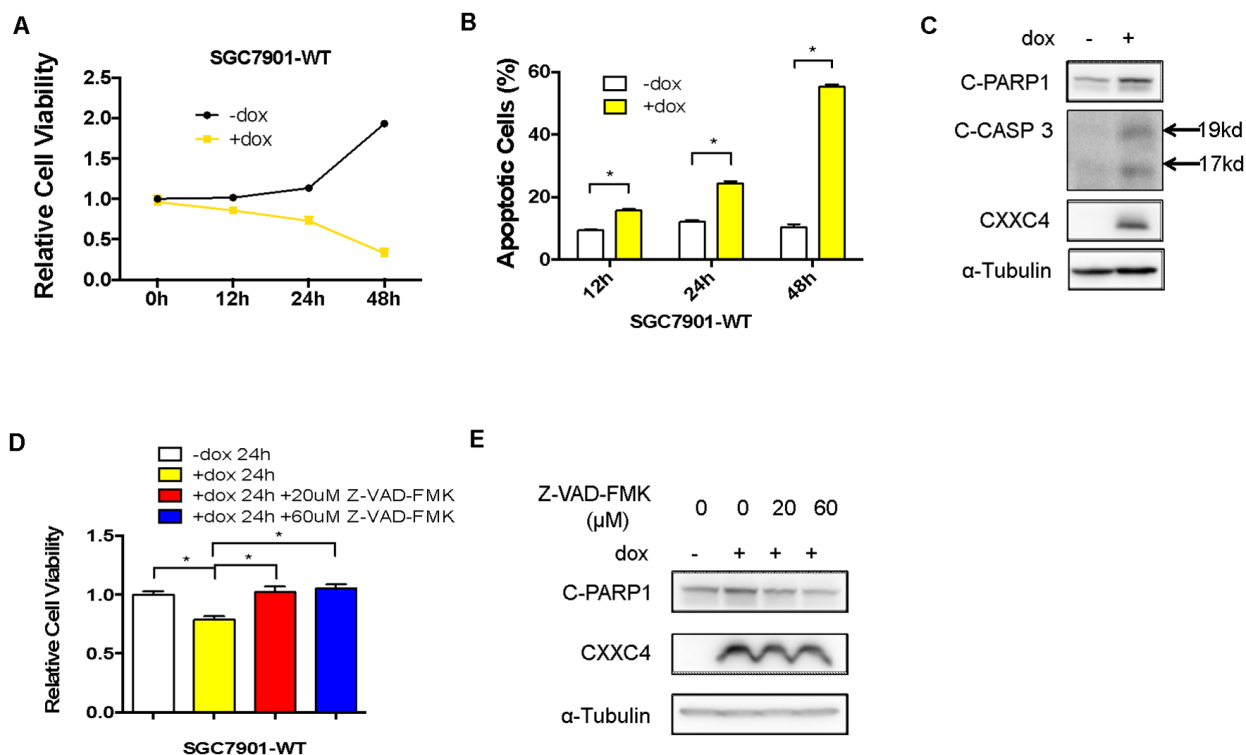

**Figure 1: CXXC4 inhibited cell growth by activating apoptosis.** (A) The viability of SGC7901-WT cells treated with Dox on the concentration of 0.5 $\mu$ g/ml after different time was analyzed by MTS assay. (B) The apoptosis of SGC7901-WT cells treated with Dox on the concentration of 0.5  $\mu$ g/ml after different time was determined by flow cytometry. (C) SGC7901-WT cells were treated with Dox (0.5 $\mu$ g/ml) for 24 hours and collected to determine the protein level of cleaved PARP1, cleaved Caspase 3 and CXXC4 by Western blotting. (D) The viability of SGC7901-WT cells treated with Dox and the pan-caspase inhibitor Z-VAD-FMK was analyzed by MTS assay. (E) The effect of the pan-caspase inhibitor Z-VAD-FMK on SGC7901-WT cells pre-treated with Dox was determined by Western blotting. (\* $P$ <0.05).

Yeast Two Hybrid system was introduced to evaluate the DNA binding activity of CXXC4. We constructed expression vectors expressing CXXC4-AD (GAL4 activation domain) and CXXC4-BD (GAL4 binding domain) fusion proteins and transformed them into yeast cells, respectively. Interestingly, we found that CXXC4-AD fusion protein could inhibit yeast cell proliferation (CXXC4-WT-AD in Figure 2C). However, it lost its growth inhibitory ability after the disruption of potential DNA-binding sites by mutating all six Cysteines to Alanines in CXXC domain (Figure 2C and 2D). In contrast, CXXC4-BD fusion protein failed to constrain yeast cell proliferation (Figure 2E). To validate this finding in mammalian cells, we

expressed CXXC4 mutant with defective CXXC domain in human gastric cancer cells as described in Figure 1 (SGC7901-MT in Figure 2F–2H). In contrast to wild type CXXC4, the CXXC4 mutant was unable to induce growth inhibition (Figure 2F) and apoptosis activation (Figure 2G and 2H). Collectively, these results suggested that CXXC4 had a DNA binding ability to potentially affect the transcription of gene related to apoptosis.

### Identification of GDF15 as a potential target of CXXC4

To further uncover how CXXC4 affects the apoptosis, we analyzed gene expression profiles before

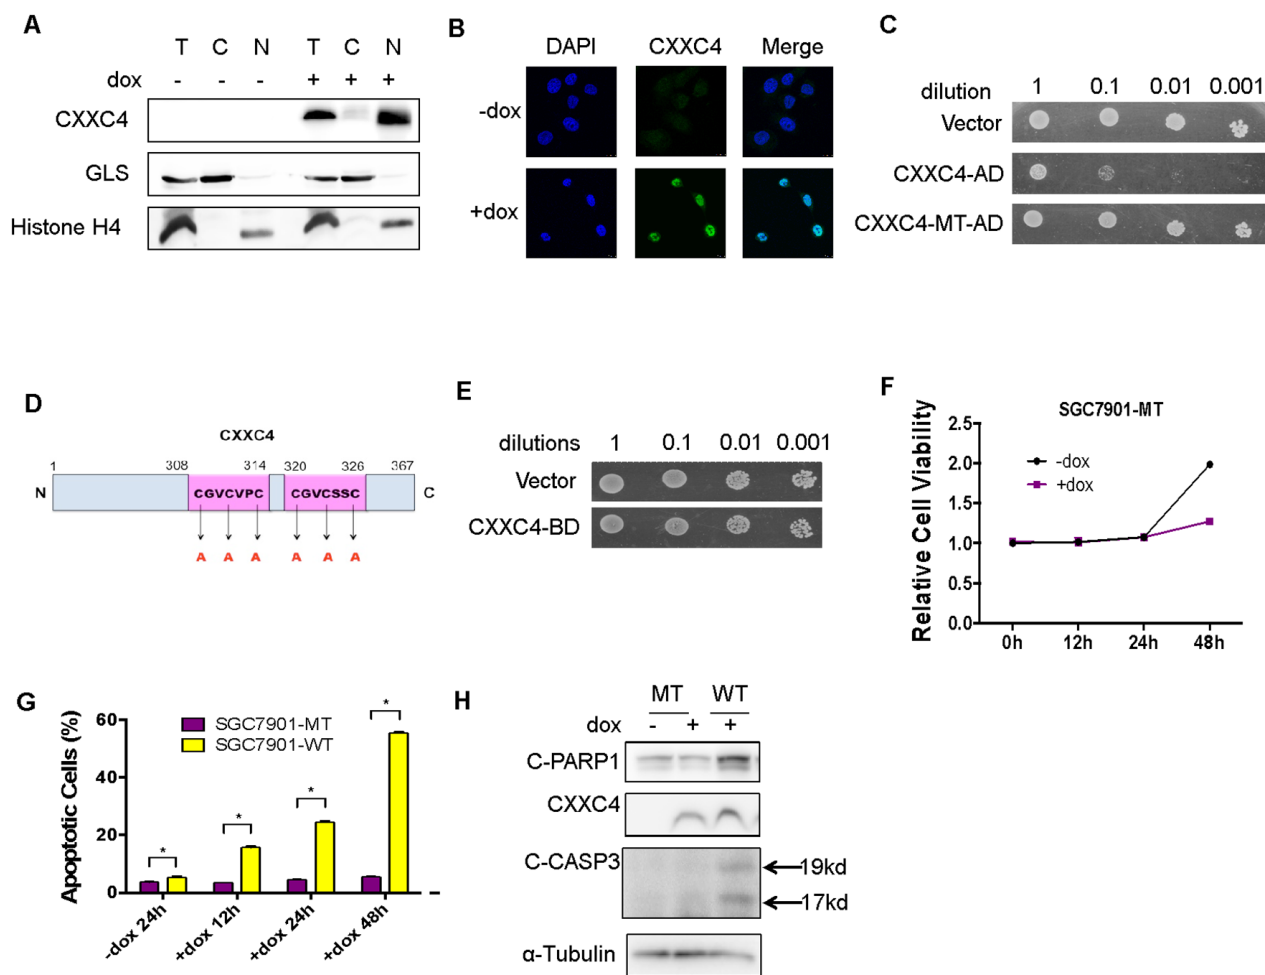

**Figure 2: CXXC4 localized in the nucleus and activated apoptosis through its DNA binding domain.** (A) Cytoplasm and nuclear fractions of the SGC7901-WT cells were isolated to detect the location of CXXC4 by Western blotting. (B) SGC7901-WT cells treated with or without Dox (0.5µg/ml) for 24h were analyzed by immunofluorescence. DAPI was used to stain the nuclei. (C) The proliferation of yeast cells transfected with CXXC4-AD or CXXC4-MT-AD were analyzed compared to the proliferation of yeast cells transfected with empty vector. (D) Schematic representation of mutant CXXC4 sites. (E) The proliferation of yeast cells transfected with CXXC4-BD was analyzed compared to the proliferation of yeast cells transfected with empty vector. (F) The viability of SGC7901-MT cells treated with Dox on the concentration of 0.5µg/ml after different time was analyzed by MTS assay. (G) The apoptosis of SGC7901-MT cells treated with Dox on the concentration of 0.5 µg/ml after different time was determined by flow cytometry. (H) SGC7901-MT cells were treated with Dox (0.5µg/ml) for 24 hours and collected to determine the protein level of cleaved PARP 1, cleaved Caspase 3 and CXXC4 by Western blotting. (\**P* < 0.05).

and after CXXC4 depletion or overexpression in human gastric cancer cells. Among the 30 genes potentially regulated by CXXC4 (Figure 3A), 11 genes were relative to apoptosis (Figure 3B). We chose GDF15 for further analysis since it was significantly upregulated after the expression of wild CXXC4 rather than mutated CXXC4 (Figure 3C and 3D). Wild type also increased the protein level of GDF15 (Figure 3E). In addition, knocking-down of CXXC4 expression reversed CXXC4-stimulated GDF15 expression at both mRNA and protein levels (Figure 3F and 3G), further supporting the specific

regulation of GDF15 expression by CXXC4. Therefore, GDF15 was a novel target directly regulated by CXXC4.

### CXXC4 activated apoptosis through GDF15

As CXXC4 functioned to be a tumor suppressor and GDF15 was a novel CXXC4 downstream target, we further explored the potential tumor suppressing function of GDF15 in gastric cancer. Indeed, overexpression of GDF15 effectively induced the apoptosis in SGC7901 cells (Figure 4A). Furthermore, the growth inhibitory effect of CXXC4 was greatly impaired by the depletion of GDF15

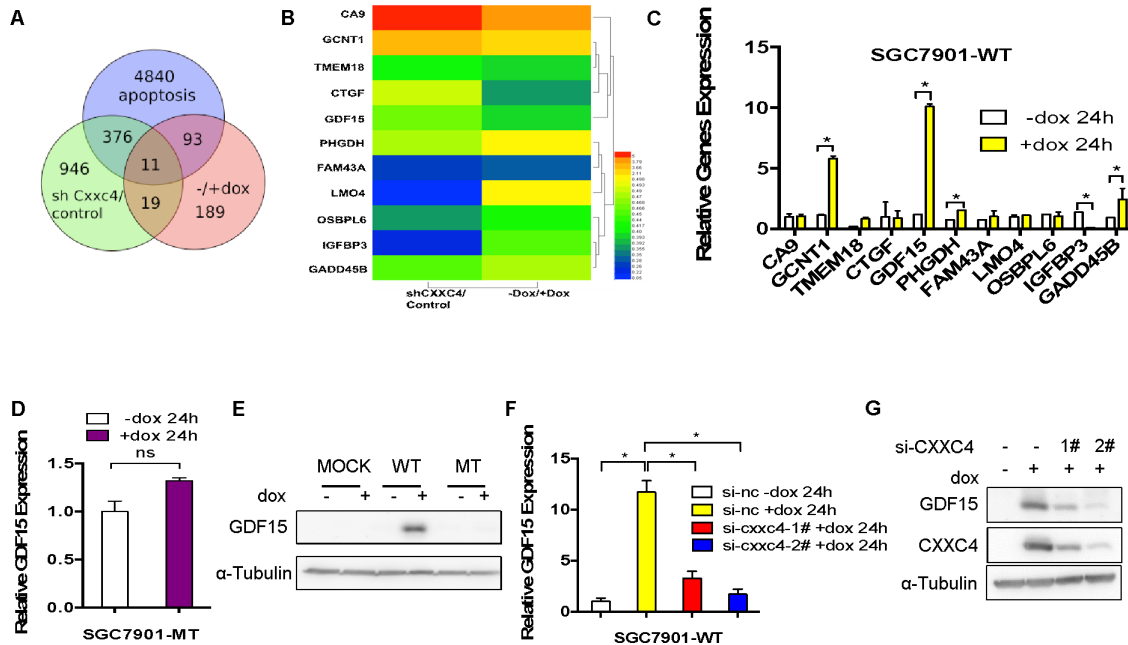

**Figure 3: Identification of GDF15 as a potential target of CXXC4.** (A) Deregulated genes in cells with depletion of CXXC4 or overexpression of CXXC4 and apoptotic relative genes in SGC7901-WT cells were overlapped. (B) Deregulation of potential CXXC4 target genes was summarized by heat map. (C) The expressions of 11 genes before and after CXXC4 expression were determined by quantitative RT-PCR. (D) GDF15 expression before and after CXXC4 expression in SGC7901-MT cells was analyzed by qRT-PCR. (E) GDF15 expression in SGC7901-MOCK, WT, MT cells before and after Dox treatment were analyzed by western blotting. (F) GDF15 expression before and after CXXC4 depletion in SGC7901-WT cells that were pre-treated with Dox for 24h was analyzed by RT-qPCR. (G) The amount of GDF15 in SGC7901-WT cells before and after CXXC4 depletion was determined by western blotting. (\* $P < 0.05$ ).

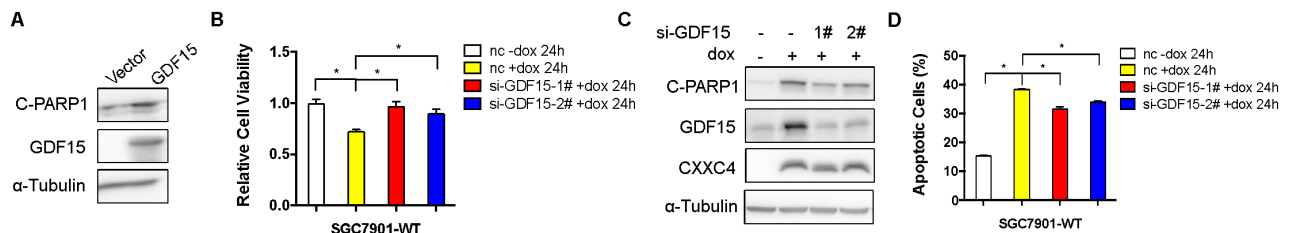

**Figure 4: CXXC4 activated apoptosis through GDF15.** (A) The effect of ectopic GDF15 expression on SGC7901-WT cells was analyzed by western blotting. (B) The viability of SGC7901-WT cells that were pre-treated with Dox for 24h after GDF15 depletion was analyzed by MTS assay. (C) The levels of cleaved PARP1 and CXXC4 before and after GDF15 depletion were determined by western blotting. (D) The apoptosis of SGC7901-WT cells that were pre-treated with Dox for 24h after GDF15 depletion was determined by flow cytometry. (\* $P < 0.05$ ).

(Figure 4B). Consistently, cell apoptosis was less activated by CXXC4 when GDF15 expression was knocked down (Figure 4C and 4D). In summary, CXXC4 activates apoptosis through upregulating GDF15 expression.

### CXXC4 activated GDF15 transcription through enhancing the interaction of Sp1 with GDF15 promoter

Next, we further investigated the mechanism how CXXC4 activated GDF15 transcription. Chromatin immunoprecipitation (ChIP) assay revealed that wild type CXXC4 enriched more GDF15 promoter DNA than mutated CXXC4 (Figure 5A), indicating a physical interaction of CXXC domain in CXXC4 with GDF15 promoter. Interestingly, we have found the binding consensus sequence of the transcriptional factor called Specificity protein 1 (Sp1) was presented in the GC box located between -133 bp and -41bp of the GDF15 promoter [20, 25–30]. Therefore, we hypothesized that Sp1 could be involved in the transcriptional regulation of GDF15. Indeed, knockdown of Sp1 led to the decreased expression of GDF15 both in mRNA and protein levels (Figure 5B and 5C). ChIP experiment also confirmed the interaction

of Sp1 with GDF15 promoter (Figure 5D). Importantly, the binding ability of Sp1 to GDF15 promoter was further enhanced in the presence of CXXC4 (Figure 5D). Therefore, CXXC4 activated GDF15 transcription probably through enhancing the interaction of Sp1 with GDF15.

### DISCUSSION

Previously, CXXC4 was identified as a tumor suppressor regulated by EZH2 [24, 31]. It functioned to inhibit both Wnt/ $\beta$ -catenin signaling pathway by interacting with Disheveled and MAPK/ERK signaling by binding to MEK1 [9, 11, 24]. By doing so, CXXC4 down-regulation was associated with poor outcome in gastric cancer patients [9, 11, 12, 24, 31–34]. However, given the presence of CXXC domain, CXXC4 might have other functions related with its potential DNA binding capability. For example, CXXC4 was found to downregulate TET2/3 (Ten-Eleven-Translocation 2/3) protein expression and caspase activation in a manner depending on the interaction of its CXXC domain with DNA [12, 15, 33, 35]. In the present study, we found CXXC4 activated the transcription of GDF15 to induce apoptosis in gastric cancer (Figure 6).

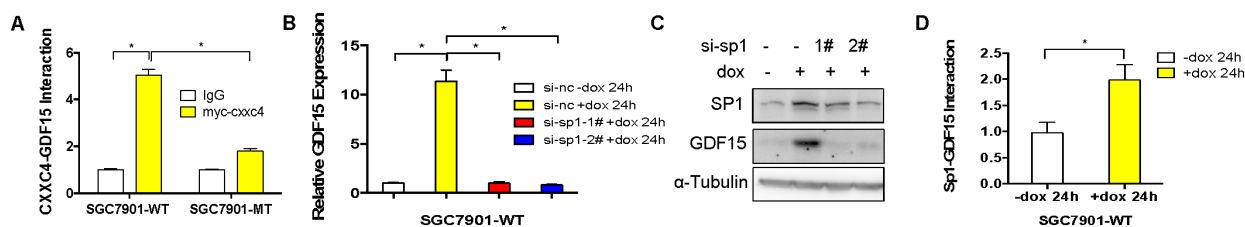

**Figure 5: CXXC4 activated GDF15 transcription through enhancing the interaction of Sp1 with GDF15.** (A) The interaction of CXXC4 with GDF15 promoter in SGC7901-WT cells was analyzed by ChIP qPCR. (B) GDF15 expression before and after Sp1 depletion in SGC7901-WT cells that were pre-treated with Dox for 24h was analyzed by RT-qPCR. (C) The amount of GDF15 in SGC7901-WT cells before and after Sp1 depletion was determined by western blotting. (D) The interaction of Sp1 to GDF15 promoter region in SGC7901-WT cells was analyzed by ChIP followed by qPCR. (\* $P < 0.05$ ).

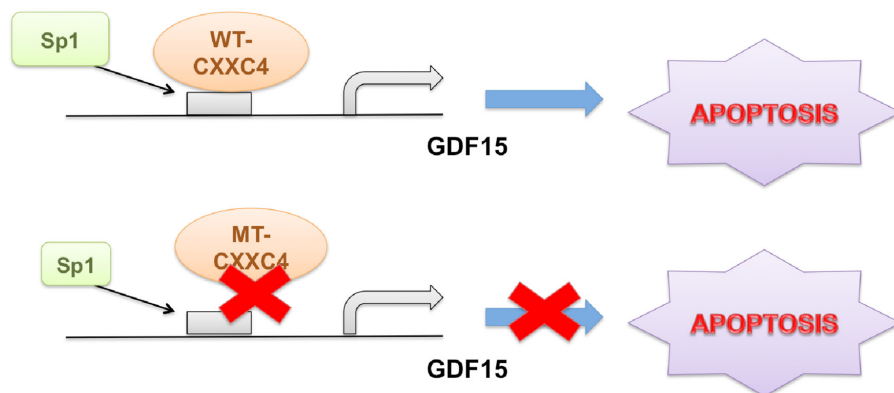

**Figure 6: Schematic diagram of CXXC4 activated apoptosis.** CXXC4 activated GDF15 transcription through enhancing the interaction of Sp1 with GDF15 promoter to induce cell apoptosis in human gastric cancer. While CXXC4 with mutations in its DNA binding domain failed to induce apoptosis through the pathway mentioned above.

**Table 1: Primers and siRNAs used in the study**

| Primers    |                                                       |
|------------|-------------------------------------------------------|
| Name       | Sequence                                              |
| GAPDH      | F: GGAGTCAACGGATTTGGT<br>R: GTGATGGGATTTCCATTGAT      |
| CA9        | F: TGACTTCAGCCGCTACTTCC<br>R: GTTCAGCTGTAGCCGAGAGT    |
| GCNT1      | F: AAGACTCGTGCAGCACATCA<br>R: TTATCAGAGCTGCAACGGCA    |
| TMEM18     | F: AGAGAGGATTTGGCGCCCT<br>R: GTCCAGTCCGTCTGCGTGAG     |
| CTGF       | F: TTAGCGTGCTCACTGACCTG<br>R: GCCACAAGCTGTCCAGTCTA    |
| GDF15      | F: GCAAGAACTCAGGACGGTGA<br>R: CGAGGTCGGTGTTCGAATCT    |
| PHGDH      | F: GAGCGGGAGCTGGAGAATAC<br>R: GGCTGTCACTGATGAGCACT    |
| FAM43A     | F: CCGTCAGGGCACCAAGATG<br>R: CGGTACACCCAGGCGAAGA      |
| LMO4       | F: ATCCACATGCAAGTGATGAAGC<br>R: GAGGAACTGCACACAATCGC  |
| OSBPL6     | F: CTGTCGGTGCTGGAGATCG<br>R: CTGTTTTCCCAGCAAGTGGC     |
| IGFBP3     | F: ATGCTAGTGAGTCGGAGGAA<br>R: ATTCTGTCTCCCGCTTGGAC    |
| GADD45B    | F: TCTGCCTCTTGCCATTGAC<br>R: CCGTGTGAGGGTTCGTGAC      |
| GDF15 ChIP | F: GCCAGCTGAGGATGACGATT<br>R: CACGCTCGCTCCCATCATAA    |
| siRNA      |                                                       |
| Name       | Sequence                                              |
| CXXC4-1#   | S: GGGAAUGCAUGAACAAGCUTT<br>AS: AGCUUGUUCAUGCAUUCCTT  |
| CXXC4-2#   | S: CACAGACAGUGCGUUUCAATT<br>AS: UUGAAACGCACUGUCUGGTT  |
| GDF15-1#   | S: CCAGCUACAAUCCCAUGGUTT<br>AS: ACCAUGGGAUUGUAGCUGGTT |
| GDF15-2#   | S: CCGGAUACUCACGCCAGAATT<br>AS: UUCUGGCGUGAGUAUCCGGTT |
| Sp1-1#     | S: GUGCAAACCAACAGAUUAUTT<br>AS: AUAAUCUGUUGGUUUGCACTT |
| Sp1-2#     | S: CCAGCAACAUGGGAAUUAUTT<br>AS: AUAAUCCCAUGUUGCUGGTT  |

F: Forward Primer.  
R: Reversed Primer.  
S: Sense.  
AS: Anti-sense.

CXXC-type zinc finger domain has been shown to be related to DNA and histone modification [13–15]. CXXC4 gene seems to be evolved from chromosomal gene inversion of the ancestral TET2 (tet methylcytosine dioxygenase 2) gene, thus separating the CXXC domain from the catalytic domain. CXXC4 could bind DNA sequences containing unmethylated CpG dinucleotides [12]. We illustrated that CXXC4 was located in the nucleus and activated apoptosis through its CXXC DNA binding domain. We provided the preliminary evidence that GDF15 served as a potential target of CXXC4. After the mutation of all six amino acids (Cysteine to Alanine) in CXXC domain, both growth inhibition and GDF15 induction were impaired. The relevance of DNA methylation/demethylation to CXXC4-activated GDF15 transcription needs to be further clarified.

GDF15 could function both positively and negatively on tumorigenesis and the nature of its effects depends on the cellular context and cell type [16]. Given the results of our present study, it is likely that CXXC4 was a positive regulator of GDF15 and GDF15 also functioned as a suppressor of tumor progression by inducing cell apoptosis in human gastric cancer. These findings are consistent with some reports that showed GDF15 was responsible for Nonsteroidal Anti-inflammatory Drugs (NSAID)-induced apoptosis in gastric cancer cells [22, 36–38] and the expression of GDF15 in cancer tissues was lower than that of normal gastric tissues [39, 40]. However, some studies found that GDF15 expression was up-regulated in gastric cancer patients and its expression was strongly associated with cancer metastasis and invasiveness [23, 41–43]. Nonetheless, our studies clarified a new signaling pathway of CXXC4/GDF15-induced apoptosis in gastric cancer.

Recent studies have shed light on the possible transcription factors important to the regulation of GDF15 transcription, such as p53, EGR-1 and Sp1 [16, 25, 28, 29, 44]. Interestingly, the interaction of Sp1 with GDF15 promoter was enhanced in the presence of CXXC4. However, it remains unknown whether CXXC4 recruits Sp1 to GDF15 promoter or CXXC4 remodels GDF15 promoter from optimal Sp1 interaction. More studies are needed to figure out the underlying mechanisms and validate such a regulation in other cancers.

In summary, CXXC4 stimulated GDF15 transcription via enhancing Sp1 binding to activate apoptosis in human gastric cancer. These findings have potential implications for CXXC4 with respect to its suppressive role on the pathogenesis of gastric cancer. Therefore, our results opened a new avenue for investigating novel functions of CXXC4 relevant to cancer development and provide important information for the management of human gastric cancer.

## MATERIALS AND METHODS

### Cell lines, antibodies and plasmids

All cell lines were cultured in RPMI 1640 medium supplemented with 10% fetal bovine serum and incubated at 5% CO<sub>2</sub>, 37°C and 95% humidity, unless specifically indicated. Antibody to CXXC4 was purchased from Thermo Fisher (Rockford, IL, USA). Antibodies to Cleaved-PARP1 and Cleaved-Caspase 3 were purchased from Cell Signaling Technology (Boston, MA, USA). Antibody to  $\alpha$ -tubulin was purchased from Sigma-Aldrich (St. Louis, MO, USA). Antibody to GLS was purchased from Abgent (San Diego, CA, USA). Antibody to Histone H4 was purchased from Abcam (Cambridge, MA, USA). Antibody to GDF15 was purchased from Abclonal (Cambridge, MA, USA). Antibody to Sp1 was purchased from Santa Cruz (Dallas, TX, USA). Z-VAD-FMK was purchased from Selleckchem (Houston, TX, USA). The GDF15 plasmid was kindly given by professor Maode Lai (Zhejiang University, Hangzhou, China) [45–47].

### Flow cytometry analysis

$4 \times 10^5$  cells were cultured overnight in 6-well plates treated with or without doxycycline (Dox) and harvested after 12, 24 or 48 hours. Cell apoptosis was detected with apoptosis kit (FITC Annexin V Apoptosis Detection Kit I, BD Bioscience, Bedford, MA, USA). Briefly, cells were washed twice with cold phosphate buffer saline (PBS) and incubated in 100  $\mu$ L binding buffer with 5  $\mu$ L of FITC Annexin V and 5  $\mu$ L PI for 15 minutes in the dark followed by flow cytometry analysis.

### Cell viability assay

MTS assay was performed with the CellTiter 96<sup>®</sup> Aqueous No-Radioactive Cell Proliferation Assay Kit (Promega, Madison, WI, USA). The cells were seeded into a 96-well plate and cultured overnight before adding Dox or PBS for 12hr, 24hr, 36hr or 48hr, the cell viability was measured following the manufacturer's instruction.

### Western blotting analysis

Cells treated with various concentrations were collected and lysed in Cytobuster Protein Extraction Reagent (Novagen, Darmstadt, Germany) and protein concentrations were determined by Bio-Rad protein assay kit II (Bio-Rad Laboratories, Hercules, CA, USA). Equal amounts of cellular protein were resolved by SDS-PAGE and transferred to PVDF membrane. The membrane was probed with the indicated primary antibodies, washed with TBS-T (0.01M TRIS-HCl Buffer, 8.8g/L NaCl, 0.1% Tween-20), then incubated with suitable HRP-conjugated second antibodies

(Dako, Copenhagen, DK) and visualized with enhanced chemiluminescence (EMD Millipore, Temecula, CA, USA).

### Lentivirus infection

To generate the Dox-inducible CXXC4 expression vector, Myc flag followed by CXXC4 coding sequence was sub-cloned into CV051 vector (Genechem, Shanghai, China) using EcoRI and MluI restriction sites. SGC7901-WT cells were generated by transfecting with vector. SGC7901-MT cells were generated by transfecting with lentivirus containing the mutant CXXC domain (6C to 6A) vector. SGC7901-MOCK cells were generated by transfecting with lentivirus containing the empty vector. After infection, the cells with plasmid described above were selected for 2 weeks with complete RPMI 1640 medium containing puromycin (1 µg/mL).

### Yeast two-hybrid analysis

Full length CXXC4 (CXXC4-WT) or mutant (CXXC4-MT) were inserted into yeast two-hybrid system plasmids pGBKT7 or pGADT7. CXXC4/pGBKT7 or CXXC4/pGADT7 plasmids were transformed into yeast strain Y2HGold respectively according to the manufacturer's instruction, and transformants were grown on plates with synthetic complete medium without Trp (for CXXC4/pGBKT7) or Leu (for CXXC4/pGADT7) in a 30°C incubator for 3-5 days. Yeast colonies were re-amplified in synthetic complete medium with shaking at 200rpm under 30°C overnight. Finally, a series of 1/10 dilution of yeast cells from an initiation concentration with  $1 \times 10^6$  cells/mL were prepared, and 10 µL of each diluted yeast cells were dotted on the suitable plates with the synthetic complete medium. The growth of yeast cells was checked and photographed after 3-5 days incubation.

### RNA extraction and quantitative real-time RT-qPCR

Total RNA was extracted by a TRIzol reagent (Invitrogen, Carlsbad, CA, USA) according to the manufacturer's instruction. RNA concentrations were quantified by NanoDrop™ 2000 (Thermo Scientific, Waltham, MA, USA). Reverse transcription reaction was performed using 2µg of total RNA with Quantscript RT Kit (Tiangen biotechnology, Beijing, China). The mRNA expression level was determined by RT-qPCR using Bestar SybrGreen qPCR mastermix (DBI, Shanghai, China) and LightCycler 480® II Real-Time PCR System (Roche, Basel, CH). Primers used are listed in Table 1.

### Small interfering RNAs (siRNAs) and transfection

siRNAs specific for CXXC4, GDF15 and Sp1 were synthesized by GenePharma (Shanghai, China).

The sequences of siRNAs are listed in Table 1. Cells were seeded over-night in 6-well plates ( $4 \times 10^5$ /well) and transfected with siRNA duplexes (20 nM) using Lipofectamine™ RNAiMAX transfection reagent (Invitrogen, Carlsbad, CA, USA) according to the manufacturer's instructions.

### Chromatin immunoprecipitation assay

ChIP assay was carried out using the SimpleChIPTM Enzymatic Chromatin IP Kit (Cell Signaling Technology, Danvers, MA, USA). In brief,  $4 \times 10^7$  cells were fixed with 4% formaldehyde. Cells were then lysed and chromatin was harvested and fragmented using enzyme digestion. The chromatin was then subjected to immunoprecipitation using antibodies specific to CXXC4 or Sp1. After immunoprecipitation, the protein-DNA cross-links were reversed and the DNA was purified. The enriched DNA sequence was detected by quantitative real-time PCR with a pair of primers around the CXXC4 binding sites of GDF15. The primers used for ChIP assay are listed in Table 1.

### Statistical analysis

The Student's t-test was used to explore the difference in gene expression and cell growth. The probability of overall survival was calculated with the Kaplan–Meier method. All statistical analyses were performed using Graph-Pad Prism or SPSS software 22.0.  $P < 0.05$  was considered statistically significant.

### CONFLICTS OF INTEREST

The authors declare no conflicts of interest.

### FUNDING

This grant was supported by national natural science foundation of china (81372178; 81502386), the national natural science foundation of Zhejiang Province (grant number:LQ15H160005), the department of health in Zhejiang Province (grant number: WKJ-ZJ-1520; 2016KYA109) and Zhejiang Provincial Program for High-level Innovative Healthcare talents.

### REFERENCES

1. Ferro A, Peleteiro B, Malvezzi M, Bosetti C, Bertuccio P, Levi F, Negri E, La Vecchia C, Lunet N. Worldwide trends in gastric cancer mortality (1980-2011), with predictions to 2015, and incidence by subtype. *Eur J Cancer*. 2014; 50: 1330-44. <https://doi.org/10.1016/j.ejca.2014.01.029>.
2. Corso S, Giordano S. How can gastric cancer molecular profiling guide future therapies? *Trends Mol Med*. 2016; 22: 534-44. <https://doi.org/10.1016/j.molmed.2016.05.004>.



3. Ferlay J, Soerjomataram I, Dikshit R, Eser S, Mathers C, Rebelo M, Parkin DM, Forman D, Bray F. Cancer incidence and mortality world wide: sources, methods and major patterns in GLOBOCAN 2012. *Int J Cancer*. 2015; 136: E359-86. <https://doi.org/10.1002/ijc.29210>.
4. Takahashi T, Saikawa Y, Kitagawa Y. Gastric cancer: current status of diagnosis and treatment. *Cancers (Basel)*. 2013; 5: 48-63. <https://doi.org/10.3390/cancers5010048>.
5. Sonohara F, Inokawa Y, Hayashi M, Kodera Y, Nomoto S. Epigenetic modulation associated with carcinogenesis and prognosis of human gastric cancer. *Oncol Lett*. 2017; 13: 3363-8. <https://doi.org/10.3892/ol.2017.5912>.
6. Zhang H, Xue Y. Wnt pathway is involved in advanced gastric carcinoma. *Hepatogastroenterology*. 2008; 55: 1126-30.
7. Katoh Y, Katoh M. Hedgehog signaling pathway and gastric cancer. *Cancer Biol Ther*. 2005; 4: 1050-4.
8. Singh SS, Yap WN, Arfuso F, Kar S, Wang C, Cai W, Dharmarajan AM, Sethi G, Kumar AP. Targeting the PI3K/Akt signaling pathway in gastric carcinoma: A reality for personalized medicine? *World J Gastroenterol*. 2015; 21: 12261-73. <https://doi.org/10.3748/wjg.v21.i43.12261>.
9. Kojima T, Shimazui T, Hinotsu S, Joraku A, Oikawa T, Kawai K, Horie R, Suzuki H, Nagashima R, Yoshikawa K, Michiue T, Asashima M, Akaza H, et al. Decreased expression of CXXC4 promotes a malignant phenotype in renal cell carcinoma by activating Wnt signaling. *Oncogene*. 2009; 28: 297-305. <https://doi.org/10.1038/onc.2008.391>.
10. Stewart DJ, Chang DW, Ye Y, Spitz M, Lu C, Shu X, Wampfler JA, Marks RS, Garces YI, Yang P, Wu X. Wnt signaling pathway pharmacogenetics in non-small cell lung cancer. *Pharmacogenomics J*. 2014; 14: 509-22. <https://doi.org/10.1038/tpj.2014.21>.
11. Hino S, Kishida S, Michiue T, Fukui A, Sakamoto I, Takada S, Asashima M, Kikuchi A. Inhibition of the Wnt signaling pathway by Idax, a novel Dvl-binding protein. *Mol Cell Biol*. 2001; 21: 330-42. <https://doi.org/10.1128/MCB.21.1.330-342.2001>.
12. Ko M, An J, Bandukwala HS, Chavez L, Aijo T, Pastor WA, Segal MF, Li H, Koh KP, Lahdesmaki H, Hogan PG, Aravind L, Rao A. Modulation of TET2 expression and 5-methylcytosine oxidation by the CXXC domain protein IDAX. *Nature*. 2013; 497: 122-6. <https://doi.org/10.1038/nature12052>.
13. Cierpicki T, Risner LE, Grembecka J, Lukasik SM, Popovic R, Omonkowska M, Shultis DD, Zeleznik-Le NJ, Bushweller JH. Structure of the MLL CXXC domain-DNA complex and its functional role in MLL-AF9 leukemia. *Nat Struct Mol Biol*. 2010; 17: 62-8. <https://doi.org/10.1038/nsmb.1714>.
14. Xu C, Bian C, Lam R, Dong A, Min J. The structural basis for selective binding of non-methylated CpG islands by the CFP1 CXXC domain. *Nat Commun*. 2011; 2: 227. <https://doi.org/10.1038/ncomms1237>.
15. Liu N, Wang M, Deng W, Schmidt CS, Qin W, Leonhardt H, Spada F. Intrinsic and extrinsic connections of Tet3 dioxygenase with CXXC zinc finger modules. *PLoS One*. 2013; 8: e62755. <https://doi.org/10.1371/journal.pone.0062755>.
16. Wang X, Baek SJ, Eling TE. The diverse roles of nonsteroidal anti-inflammatory drug activated gene (NAG-1/GDF15) in cancer. *Biochem Pharmacol*. 2013; 85: 597-606. <https://doi.org/10.1016/j.bcp.2012.11.025>.
17. Mimeault M, Batra SK. Divergent molecular mechanisms underlying the pleiotropic functions of macrophage inhibitory cytokine-1 in cancer. *J Cell Physiol*. 2010; 224: 626-35. <https://doi.org/10.1002/jcp.22196>.
18. Li PX, Wong J, Ayed A, Ngo D, Brade AM, Arrowsmith C, Austin RC, Klamut HJ. Placental transforming growth factor-beta is a downstream mediator of the growth arrest and apoptotic response of tumor cells to DNA damage and p53 overexpression. *J Biol Chem*. 2000; 275: 20127-35. <https://doi.org/10.1074/jbc.M909580199>.
19. Martinez JM, Baek SJ, Mays DM, Tithof PK, Eling TE, Walker NJ. EGR1 is a novel target for AhR agonists in human lung epithelial cells. *Toxicol Sci*. 2004; 82: 429-35. <https://doi.org/10.1093/toxsci/kfh272>.
20. Lim JH, Park JW, Min DS, Chang JS, Lee YH, Park YB, Choi KS, Kwon TK. NAG-1 up-regulation mediated by EGR-1 and p53 is critical for quercetin-induced apoptosis in HCT116 colon carcinoma cells. *Apoptosis*. 2007; 12: 411-21. <https://doi.org/10.1007/s10495-006-0576-9>.
21. Lee SH, Krisanapun C, Baek SJ. NSAID-activated gene-1 as a molecular target for capsaicin-induced apoptosis through a novel molecular mechanism involving GSK3beta, C/EBPbeta and ATF3. *Carcinogenesis*. 2010; 31: 719-28. <https://doi.org/10.1093/carcin/bgq016>.
22. Jang TJ, Kang HJ, Kim JR, Yang CH. Non-steroidal anti-inflammatory drug activated gene (NAG-1) expression is closely related to death receptor-4 and -5 induction, which may explain sulindac sulfide induced gastric cancer cell apoptosis. *Carcinogenesis*. 2004; 25: 1853-8. <https://doi.org/10.1093/carcin/bgh199>.
23. Kim KK, Lee JJ, Yang Y, You KH, Lee JH. Macrophage inhibitory cytokine-1 activates AKT and ERK-1/2 via the transactivation of ErbB2 in human breast and gastric cancer cells. *Carcinogenesis*. 2008; 29: 704-12. <https://doi.org/10.1093/carcin/bgn031>.
24. Lu H, Jin W, Sun J, Feng L, Lan H, Shen Q, Ma Y, Li J, Yue Y, Jin H, Wang X. New tumor suppressor CXXC finger protein 4 inactivates mitogen activated protein kinase signaling. *FEBS Lett*. 2014; 588: 3322-6. <https://doi.org/10.1016/j.febslet.2014.07.014>.
25. Yoshioka H, Kamitani H, Watanabe T, Eling TE. Nonsteroidal anti-inflammatory drug-activated gene (NAG-1/GDF15) expression is increased by the histone deacetylase inhibitor trichostatin A. *J Biol Chem*. 2008; 283: 33129-37. <https://doi.org/10.1074/jbc.M805248200>.

26. Baek SJ, Horowitz JM, Eling TE. Molecular cloning and characterization of human nonsteroidal anti-inflammatory drug-activated gene promoter. Basal transcription is mediated by Sp1 and Sp3. *J Biol Chem.* 2001; 276: 33384-92. <https://doi.org/10.1074/jbc.M101814200>.
27. Thapa D, Babu D, Park MA, Kwak MK, Lee YR, Kim JM, Kwon TK, Kim JA. Induction of p53-independent apoptosis by a novel synthetic hexahydrocannabinol analog is mediated via Sp1-dependent NSAID-activated gene-1 in colon cancer cells. *Biochem Pharmacol.* 2010; 80: 62-71. <https://doi.org/10.1016/j.bcp.2010.03.008>.
28. Baek SJ, Kim JS, Moore SM, Lee SH, Martinez J, Eling TE. Cyclooxygenase inhibitors induce the expression of the tumor suppressor gene EGR-1, which results in the up-regulation of NAG-1, an antitumorigenic protein. *Mol Pharmacol.* 2005; 67: 356-64. <https://doi.org/10.1124/mol.104.005108>.
29. Baek SJ, Kim JS, Nixon JB, DiAugustine RP, Eling TE. Expression of NAG-1, a transforming growth factor-beta superfamily member, by troglitazone requires the early growth response gene EGR-1. *J Biol Chem.* 2004; 279: 6883-92. <https://doi.org/10.1074/jbc.M305295200>.
30. Shim M, Eling TE. Protein kinase C-dependent regulation of NAG-1/placental bone morphogenic protein/MIC-1 expression in LNCaP prostate carcinoma cells. *J Biol Chem.* 2005; 280: 18636-42. <https://doi.org/10.1074/jbc.M414613200>.
31. Lu H, Sun J, Wang F, Feng L, Ma Y, Shen Q, Jiang Z, Sun X, Wang X, Jin H. Enhancer of zeste homolog 2 activates wnt signaling through downregulating CXXC finger protein 4. *Cell Death Dis.* 2013; 4: e776. <https://doi.org/10.1038/cddis.2013.293>.
32. Paluszczak J, Wisniewska D, Kostrzewska-Poczekaj M, Kiwerska K, Grenman R, Mielcarek-Kuchta D, Jarmuz-Szymczak M. Prognostic significance of the methylation of Wnt pathway antagonists-CXXC4, DACT2, and the inhibitors of sonic hedgehog signaling-ZIC1, ZIC4, and HHIP in head and neck squamous cell carcinomas. *Clin Oral Investig.* 2017; 21: 1777-88. <https://doi.org/10.1007/s00784-016-1946-5>.
33. Li S, Fan R, Zhao XL, Wang XQ. CXXC4 mRNA levels are associated with clinicopathological parameters and survival of myelodysplastic syndrome patients. *Leuk Res.* 2014; 38: 1072-8. <https://doi.org/10.1016/j.leukres.2014.07.002>.
34. Michiue T, Fukui A, Yukita A, Sakurai K, Danno H, Kikuchi A, Asashima M. Xlax, an inhibitor of the canonical Wnt pathway, is required for anterior neural structure formation in *Xenopus*. *Dev Dyn.* 2004; 230: 79-90. <https://doi.org/10.1002/dvdy.20037>.
35. Xu Y, Xu C, Kato A, Tempel W, Abreu JG, Bian C, Hu Y, Hu D, Zhao B, Cerovina T, Diao J, Wu F, He HH, et al. Tet3 CXXC domain and dioxygenase activity cooperatively regulate key genes for *Xenopus* eye and neural development. *Cell.* 2012; 151: 1200-13. <https://doi.org/10.1016/j.cell.2012.11.014>.
36. Pang RP, Zhou JG, Zeng ZR, Li XY, Chen W, Chen MH, Hu PJ. Celecoxib induces apoptosis in COX-2 deficient human gastric cancer cells through Akt/GSK3beta/NAG-1 pathway. *Cancer Lett.* 2007; 251: 268-77. <https://doi.org/10.1016/j.canlet.2006.11.032>.
37. Yu CY, Su KY, Lee PL, Jhan JY, Tsao PH, Chan DC, Chen YL. Potential therapeutic role of hispidulin in gastric cancer through induction of apoptosis via NAG-1 signaling. *Evid Based Complement Alternat Med.* 2013; 2013: 518301. <https://doi.org/10.1155/2013/518301>.
38. Wang C, Wang J, Bai P. Troglitazone induces apoptosis in gastric cancer cells through the NAG-1 pathway. *Mol Med Rep.* 2011; 4: 93-7. <https://doi.org/10.3892/mmr.2010.381>.
39. Yang G, Tan Q, Xie Y, Wei B, Chen Z, Tang C, Li S, Wang C. Variations in NAG-1 expression of human gastric carcinoma and normal gastric tissues. *Exp Ther Med.* 2014; 7: 241-5. <https://doi.org/10.3892/etm.2013.1361>.
40. Wang R, Ciren YJ, Yang JL, Zhang B, Chen JP, Tang CW. [Celecoxib inhibits gastric adenocarcinoma growth via inducing expression of human nonsteroidal anti-inflammatory drug activated gene]. [Article in Chinese]. *Sichuan Da Xue Xue Bao Yi Xue Ban.* 2009; 40: 1029-32.
41. Lee DH, Yang Y, Lee SJ, Kim KY, Koo TH, Shin SM, Song KS, Lee YH, Kim YJ, Lee JJ, Choi I, Lee JH. Macrophage inhibitory cytokine-1 induces the invasiveness of gastric cancer cells by up-regulating the urokinase-type plasminogen activator system. *Cancer Res.* 2003; 63: 4648-55.
42. Park JY, Park KH, Bang S, Kim MH, Koh SS, Song SY. Expression of nonsteroidal anti-inflammatory drug-activated gene-1 (NAG-1) inversely correlates with tumor progression in gastric adenomas and carcinomas. *J Cancer Res Clin Oncol.* 2008; 134: 1029-35. <https://doi.org/10.1007/s00432-008-0362-x>.
43. Baek KE, Yoon SR, Kim JT, Kim KS, Kang SH, Yang Y, Lim JS, Choi I, Nam MS, Yoon M, Lee HG. Upregulation and secretion of macrophage inhibitory cytokine-1 (MIC-1) in gastric cancers. *Clin Chim Acta.* 2009; 401: 128-33. <https://doi.org/10.1016/j.cca.2008.12.008>.
44. Wu JF, Wang Y, Zhang M, Tang YY, Wang B, He PP, Lv YC, Ouyang XP, Yao F, Tan YL, Tang SL, Tang DP, Cayabyab FS, et al. Growth differentiation factor-15 induces expression of ATP-binding cassette transporter A1 through PI3-K/PKCzeta/SP1 pathway in THP-1 macrophages. *Biochem Biophys Res Commun.* 2014; 444: 325-31. <https://doi.org/10.1016/j.bbrc.2014.01.048>.
45. Xue H, Lu B, Zhang J, Wu M, Huang Q, Wu Q, Sheng H, Wu D, Hu J, Lai M. Identification of serum biomarkers for colorectal cancer metastasis using a differential secretome approach. *J Proteome Res.* 2010; 9: 545-55. <https://doi.org/10.1021/pr9008817>.

46. Wang L, Bu P, Ai Y, Srinivasan T, Chen HJ, Xiang K, Lipkin SM, Shen X. A long non-coding RNA targets microRNA miR-34a to regulate colon cancer stem cell asymmetric division. *Elife*. 2016; 5. <https://doi.org/10.7554/eLife.14620>.
47. Liu Z, Wei X, Zhang A, Li C, Bai J, Dong J. Long non-coding RNA HNF1A-AS1 functioned as an oncogene and autophagy promoter in hepatocellular carcinoma through sponging hsa-miR-30b-5p. *Biochem Biophys Res Commun*. 2016; 473: 1268-75. <https://doi.org/10.1016/j.bbrc.2016.04.054>.
